# Supplementary material for: ADAR1-dependent miR-3144-3p editing simultaneously induces MSI2 expression and suppresses SLC38A4 expression in liver cancer
Source: PubMed Central journal article supplement (PMC9898302; doi:10.1038/s12276-022-00916-8), 2023-01-04
Supplement: 12276_2022_916_MOESM1_ESM.pdf [file 12276_2022_916_MOESM1_ESM.pdf]

# **ADAR1-dependent miR-3144-3p editing simultaneously induces MSI2 expression and suppresses SLC38A4 expression in liver cancer**

Hyung Seok Kim,<sup>1,6</sup> Min Jeong Na,<sup>1,2,3,6</sup> Keun Hong Son,<sup>4</sup> Hee Doo Yang,<sup>2,5</sup> Sang Yean Kim,<sup>2,5</sup> Eunbi Shin,<sup>1,2,3</sup> Jin Woong Ha,<sup>1,2,3</sup> Soyoung Jeon,<sup>1,2,3</sup> Keunsoo Kang,<sup>4</sup> Kiho Moon,<sup>5</sup> Won Sang Park<sup>1,2</sup> and Suk Woo Nam.<sup>1,2,3,5</sup>

<sup>1</sup>Department of Pathology, College of Medicine, The Catholic University of Korea, 222 Banpo-daero, Seocho-gu, Seoul 06591, Republic of Korea.

<sup>2</sup>Functional RNomics Research Center, The Catholic University of Korea, 222 Banpo-daero, Seocho-gu, Seoul 06591, Republic of Korea.

<sup>3</sup>Department of Biomedicine & Health Sciences, Graduate School, The Catholic University of Korea, Seoul, 06591, Korea.

<sup>4</sup>Department of Microbiology, Dankook University, Cheonan 31116, Republic of Korea.

<sup>5</sup>NEORNAT Inc., Rm. #5104 Bldg. A, Omnibus Park, 222 Banpo-daero, Seocho-gu, Seoul 06591, Republic of Korea.

<sup>6</sup>These authors contributed equally: Hyung Seok Kim and Min Jeong Na.

## **Correspondence**

Suk Woo Nam, Ph.D., Department of Pathology, College of Medicine, The Catholic University of Korea, 222 Banpo-daero, Seocho-gu, Seoul 0659, Republic of Korea. email: [swnam@catholic.ac.kr](mailto:swnam@catholic.ac.kr)

## Supplementary tables

Supplementary Table 1. Differential expression of RNA editing gene families in liver cancer.

| Family | No. | Gene            | TCGA_LIHC*          |                  |                | Catholic_mLIHC** |                 |                | ICGC_LIRI***         |                  |                | GSE77314            |                 |                |
|--------|-----|-----------------|---------------------|------------------|----------------|------------------|-----------------|----------------|----------------------|------------------|----------------|---------------------|-----------------|----------------|
|        |     |                 | Non-tumor<br>(n=50) | Tumor<br>(n=371) | Fold<br>change | Normal<br>(n=15) | Tumor<br>(n=56) | Fold<br>change | Non-tumor<br>(n=202) | Tumor<br>(n=238) | Fold<br>change | Non-tumor<br>(n=50) | Tumor<br>(n=50) | Fold<br>change |
| ADAR   | 1   | <b>ADAR1</b>    | <b>16.43</b>        | <b>33.55</b>     | <b>2.04</b>    | <b>46.65</b>     | <b>73.67</b>    | <b>1.58</b>    | <b>21.24</b>         | <b>41.38</b>     | <b>1.95</b>    | <b>25.44</b>        | <b>41.12</b>    | <b>1.62</b>    |
|        | 2   | ADARB1          | 0.67                | 1.02             | 1.53           | 4.93             | 3.76            | -1.31          | 2.40                 | 2.71             | 1.13           | 3.62                | 2.83            | -1.28          |
|        | 3   | ADARB2          | 0.04                | 0.06             | 1.35           | 0.23             | 0.20            | -1.14          | N.E                  | 0.12             | -              | 0.27                | 0.14            | -1.96          |
| APOBEC | 1   | AICDA           | N.E                 | N.E              | -              | N.E              | N.E             | -              | N.E                  | N.E              | -              | N.E                 | N.E             | -              |
|        | 2   | APOBEC1         | N.E                 | N.E              | -              | N.E              | N.E             | -              | N.E                  | 0.46             | -              | N.E                 | N.E             | -              |
|        | 3   | APOBEC2         | N.E                 | 0.15             | -              | N.E              | N.E             | -              | 0.17                 | 0.22             | 1.32           | 0.10                | 0.16            | 1.70           |
|        | 4   | APOBEC3A        | 0.25                | 0.11             | -2.20          | 1.68             | 0.51            | -3.29          | 0.73                 | 1.39             | 1.91           | 0.50                | 0.23            | -2.16          |
|        | 5   | <b>APOBEC3B</b> | <b>0.41</b>         | <b>2.27</b>      | <b>5.52</b>    | <b>0.23</b>      | <b>1.27</b>     | <b>5.43</b>    | <b>0.49</b>          | <b>2.14</b>      | <b>4.39</b>    | <b>0.30</b>         | <b>2.48</b>     | <b>8.26</b>    |
|        | 6   | APOBEC3C        | 2.20                | 3.54             | 1.20           | 1.97             | 2.07            | 1.05           | 3.17                 | 3.02             | -1.05          | 3.07                | 2.19            | -1.40          |
|        | 7   | APOBEC3D        | 0.47                | 0.86             | 1.84           | 0.63             | 0.81            | 1.30           | 0.92                 | 1.02             | 1.11           | 1.05                | 0.88            | -1.19          |
|        | 8   | APOBEC3F        | 0.96                | 1.36             | 1.43           | 1.27             | 1.40            | 1.10           | 0.84                 | 1.06             | 1.26           | 1.36                | 1.55            | 1.14           |
|        | 9   | APOBEC3G        | 0.71                | 1.07             | 1.52           | 2.88             | 2.85            | -1.01          | 3.41                 | 3.67             | 1.08           | 4.43                | 3.51            | -1.26          |
|        | 10  | APOBEC3H        | 0.19                | 0.43             | 2.27           | 0.45             | 0.44            | -1.02          | 0.91                 | 1.13             | 1.24           | 1.06                | 0.86            | -1.23          |
|        | 11  | APOBEC4         | N.E                 | N.E              | -              | N.E              | N.E             | -              | N.E                  | N.E              | -              | N.E                 | N.E             | -              |

\*TCGA\_LIHC: The Cancer Genome Atlas\_Liver Hepatocellular Carcinoma

\*\*Catholic\_mLIHC: Catholic university\_multistage Liver Hepatocellular Carcinoma (GSE114564)

\*\*\*ICGC\_LIRI: International Cancer Genome Consortium\_Liver Cancer-RIKEN.JP

NE: Non-expression

**Supplementary Table 2. Systematic analysis of mutual exclusivity between *ADAR1* amplification and *CTNNB1* mutation in various cancers.**

| No.      | Abbreviation | Study                                 | Samples    | CTNNB1    | ADAR1     | Both     | Neither    | p-value        | Tendency                  |
|----------|--------------|---------------------------------------|------------|-----------|-----------|----------|------------|----------------|---------------------------|
| <b>1</b> | <b>LIHC</b>  | <b>Liver hepatocellular carcinoma</b> | <b>366</b> | <b>94</b> | <b>41</b> | <b>5</b> | <b>226</b> | <b>0.004**</b> | <b>Mutual exclusivity</b> |
| 2        | STAD         | Stomach adenocarcinoma                | 393        | 27        | 18        | 6        | 342        | 0.01**         | Co-occurrence             |
| 3        | LUAD         | Lung adenocarcinoma                   | 230        | 5         | 33        | 4        | 188        | 0.039*         | Co-occurrence             |
| 4        | PRAD         | Prostate adenocarcinoma               | 492        | 13        | 11        | 2        | 466        | 0.056          | None                      |
| 5        | SKCM         | Skin Cutaneous Melanoma               | 287        | 16        | 12        | 3        | 256        | 0.067          | None                      |
| 6        | UCS          | Uterine Carcinosarcoma                | 56         | 0         | 4         | 1        | 51         | 0.089          | None                      |
| 7        | UCEC         | Uterine Corpus Endometrial Carcinoma  | 242        | 70        | 17        | 3        | 152        | 0.094          | None                      |
| 8        | OV           | Ovarian serous cystadenocarcinoma     | 311        | 5         | 26        | 2        | 278        | 0.124          | None                      |
| 9        | PAAD         | Pancreatic adenocarcinoma             | 149        | 4         | 8         | 1        | 136        | 0.271          | None                      |
| 10       | CESC         | Cervical squamous cell carcinoma      | 191        | 7         | 10        | 1        | 173        | 0.384          | None                      |
| 11       | ACC          | Adrenocortical carcinoma              | 88         | 14        | 2         | 1        | 71         | 0.433          | None                      |
| 12       | ESCA         | Esophageal carcinoma                  | 184        | 10        | 9         | 1        | 164        | 0.469          | None                      |
| 13       | BRCA         | Breast invasive carcinoma             | 963        | 5         | 112       | 1        | 845        | 0.528          | None                      |
| 14       | BLCA         | Bladder Urothelial Carcinoma          | 127        | 6         | 13        | 1        | 107        | 0.568          | None                      |
| 15       | COADREAD     | Colorectal adenocarcinoma             | 220        | 12        | 7         | 0        | 201        | 0.671          | None                      |
| 16       | KIRC         | Kidney renal clear cell carcinoma     | 448        | 51        | 9         | 1        | 387        | 0.673          | None                      |
| 17       | LUSC         | Lung squamous cell carcinoma          | 178        | 5         | 11        | 0        | 162        | 0.724          | None                      |
| 18       | HNSC         | Head and Neck squamous cell carcinoma | 504        | 10        | 14        | 0        | 480        | 0.753          | None                      |
| 19       | SARC         | Sarcoma                               | 243        | 5         | 12        | 0        | 226        | 0.775          | None                      |
| 20       | PCPG         | Pheochromocytoma and Paraganglioma    | 162        | 1         | 6         | 0        | 155        | 0.963          | None                      |
| 21       | LGG          | Brain Lower Grade Glioma              | 283        | 2         | 4         | 0        | 277        | 0.972          | None                      |
| 22       | THYM         | Thymoma                               | 123        | 3         | 1         | 0        | 119        | 0.976          | None                      |
| 23       | KIRP         | Kidney renal papillary cell carcinoma | 280        | 2         | 3         | 0        | 275        | 0.979          | None                      |
| 24       | THCA         | Thyroid carcinoma                     | 399        | 2         | 1         | 0        | 396        | 0.995          | None                      |
| 25       | LAML         | Acute Myeloid Leukemia                | 188        | 0         | 0         | 0        | 188        | 1              | None                      |
| 26       | CHOL         | Cholangiocarcinoma                    | 35         | 0         | 5         | 0        | 30         | 1              | None                      |
| 27       | GBM          | Glioblastoma multiforme               | 273        | 0         | 1         | 0        | 272        | 1              | None                      |
| 28       | KICH         | Kidney Chromophobe                    | 66         | 2         | 0         | 0        | 64         | 1              | None                      |
| 29       | DLBC         | Lymphoid neoplasm                     | 48         | 0         | 3         | 0        | 45         | 1              | None                      |
| 30       | MESO         | Mesothelioma                          | 83         | 0         | 4         | 0        | 79         | 1              | None                      |
| 31       | TGCT         | Testicular Germ Cell Tumors           | 149        | 0         | 1         | 0        | 148        | 1              | None                      |
| 32       | UVM          | Uveal Melanoma                        | 80         | 1         | 0         | 0        | 79         | 1              | None                      |

\*The genomic alteration and mutation data are acquired from cBioPortal ([www.cbioportal.org](http://www.cbioportal.org))

**Supplementary Table 3. Differential expression and fold change of miR-3144-3p and ED\_miR-3144(3\_A<G) target candidates in liver cancer RNA-seq datasets.**

|                                             | No. | Genes   | TCGA_LIHC           |                  |                | Catholic_mLIHC   |                 |             | ICGC_LIRI            |                  |                |
|---------------------------------------------|-----|---------|---------------------|------------------|----------------|------------------|-----------------|-------------|----------------------|------------------|----------------|
|                                             |     |         | Non-tumor<br>(n=50) | Tumor<br>(n=371) | Fold<br>change | Normal<br>(n=15) | Tumor<br>(n=56) | Fold change | Non-tumor<br>(n=202) | Tumor<br>(n=238) | Fold<br>change |
| Canonical <i>miR-3144-3p</i><br>targets     | 1   | STXBP4  | 0.12                | 0.43             | 3.48           | 3.49             | 6.61            | 1.89        | 0.37                 | 0.89             | 2.37           |
|                                             | 2   | SUV39H2 | 0.69                | 1.89             | 2.74           | 2.25             | 5.21            | 2.31        | 1.07                 | 2.32             | 2.16           |
|                                             | 3   | MSI2    | 0.56                | 1.44             | 2.56           | 14.56            | 25.21           | 1.73        | 1.75                 | 3.44             | 1.96           |
| Edited <i>miR-3144(3_A&lt;G)</i><br>targets | 1   | INMT    | 9.65                | 2.53             | -3.82          | 26.95            | 9.6             | -2.79       | 11                   | 3.5              | -3.14          |
|                                             | 2   | GHR     | 27.20               | 7.56             | -3.60          | 84.66            | 26.75           | -3.17       | 33.28                | 10.33            | -3.22          |
|                                             | 3   | GLYAT   | 58.82               | 21.38            | -2.75          | 153.18           | 37.14           | -4.12       | 100.66               | 44.71            | -2.25          |
|                                             | 4   | SLC38A4 | 114.84              | 60.33            | -1.90          | 332.43           | 134.61          | -2.47       | 133.36               | 75.11            | -1.78          |
|                                             | 5   | HMGCS2  | 664.92              | 436.49           | -1.52          | 826.03           | 347.58          | -2.38       | 652.14               | 350.01           | -1.86          |

**Supplementary Table 4. Differential expression of MSI2 targeting genes in liver cancer.**

| No.      | Genes        | Catholic_mLIHC   |                 |                | TCGA_LIHC           |                  |                | ICGC_LIRI            |                  |                |
|----------|--------------|------------------|-----------------|----------------|---------------------|------------------|----------------|----------------------|------------------|----------------|
|          |              | Normal<br>(n=15) | Tumor<br>(n=56) | Fold<br>change | Non-tumor<br>(n=50) | Tumor<br>(n=371) | Fold<br>change | Non-tumor<br>(n=202) | Tumor<br>(n=238) | Fold<br>change |
| <b>1</b> | <b>HMGA2</b> | <b>0.07</b>      | <b>1.15</b>     | <b>16.08</b>   | <b>0.003</b>        | <b>0.16</b>      | <b>51.56</b>   | <b>0.17</b>          | <b>1.68</b>      | <b>9.65</b>    |
| <b>2</b> | <b>MKI67</b> | <b>0.70</b>      | <b>6.69</b>     | <b>9.53</b>    | <b>0.20</b>         | <b>1.57</b>      | <b>7.81</b>    | <b>0.39</b>          | <b>3.29</b>      | <b>8.36</b>    |
| <b>3</b> | <b>HOXA9</b> | <b>0.03</b>      | <b>0.13</b>     | <b>3.68</b>    | <b>0.008</b>        | <b>0.07</b>      | <b>8.24</b>    | <b>0.05</b>          | <b>0.19</b>      | <b>3.50</b>    |
| <b>4</b> | <b>MET</b>   | <b>37.51</b>     | <b>73.57</b>    | <b>1.96</b>    | <b>3.53</b>         | <b>3.96</b>      | <b>1.12</b>    | <b>10.64</b>         | <b>19.11</b>     | <b>1.80</b>    |
| 5        | SMAD3        | 8.45             | 11.33           | 1.34           | 1.83                | 2.55             | 1.39           | 7.70                 | 12.01            | 1.56           |
| 6        | BECN1        | 23.09            | 27.53           | 1.19           | 2.01                | 2.47             | 1.23           | 14.01                | 23.86            | 1.70           |
| 7        | TGFBI        | 95.44            | 106.02          | 1.11           | 3.82                | 4.58             | 1.20           | 64.99                | 96.52            | 1.49           |
| 8        | LFNG         | 1.34             | 1.33            | -1.004         | 0.79                | 1.27             | 1.61           | 1.76                 | 3.66             | 2.08           |
| 9        | NOTCH1       | 1.79             | 1.77            | -1.01          | 1.39                | 1.80             | 1.29           | 2.64                 | 3.50             | 1.33           |
| 10       | IKZF2        | 3.84             | 3.74            | -1.03          | 0.22                | 0.23             | 1.08           | 0.65                 | 0.57             | -1.12          |
| 11       | BMPR1A       | 6.60             | 6.42            | -1.03          | 0.77                | 1.09             | 1.42           | 2.22                 | 3.57             | 1.61           |
| 12       | PTEN         | 67.91            | 64.41           | -1.05          | 2.69                | 2.72             | 1.01           | 9.94                 | 10.65            | 1.07           |
| 13       | KRAS         | 10.93            | 10.00           | -1.09          | 1.76                | 1.97             | 1.12           | 4.89                 | 5.60             | 1.15           |
| 14       | BRD4         | 11.79            | 10.10           | -1.17          | 2.34                | 2.79             | 1.20           | 6.65                 | 7.97             | 1.20           |
| 15       | NUMB         | 33.57            | 27.61           | -1.22          | 2.14                | 2.33             | 1.09           | 17.16                | 18.52            | 1.08           |
| 16       | LRIG1        | 15.95            | 11.66           | -1.37          | 2.48                | 2.60             | 1.05           | 7.90                 | 8.78             | 1.11           |
| 17       | AHR          | 59.56            | 42.20           | -1.41          | 3.59                | 3.31             | -1.09          | 13.55                | 15.95            | 1.18           |
| 18       | FLT3         | 0.50             | 0.34            | -1.45          | 0.21                | 0.15             | -1.48          | 0.38                 | 0.27             | -1.39          |
| 19       | CDKN1A       | 35.99            | 22.39           | -1.61          | 5.33                | 5.18             | -1.03          | 65.02                | 54.62            | -1.19          |
| 20       | MYC          | 28.82            | 15.19           | -1.90          | 4.40                | 3.60             | -1.22          | 24.54                | 23.86            | -1.03          |
| 21       | AR           | 29.92            | 13.50           | -2.22          | 3.26                | 2.35             | -1.39          | 5.16                 | 3.58             | -1.44          |
| 22       | ESR1         | 63.15            | 14.62           | -4.32          | 1.60                | 0.49             | -3.27          | 4.03                 | 1.28             | -3.14          |
| 23       | LIN28A       | 0                | 0.008           | -              | 0.001               | 0.04             | 35.46          | 0.03                 | 0.51             | 16.56          |

**Supplementary Table 5. List of siRNA, miRNA mimics, and antisense miRNA sequences used in transfection.**

| siRNA/miRNA          | Accession No. | Strand    | Nucleotide sequence          |
|----------------------|---------------|-----------|------------------------------|
| Control siRNA        |               | Sense     | 5'-CCUACGCCACCAAUUUCGU-3'    |
|                      |               | Antisense | 5'-ACGAAAUUGGUGGCGUAGG-3'    |
| ADAR1 siRNA          | NM_001025107  | Sense     | 5'-CACCAAGGGAAGUUGACUA-3'    |
|                      |               | Antisense | 5'-UAGUCAACUUCCCUUGGUG-3'    |
| MSI2 siRNA           | NM_138962     | Sense     | 5'-CAGCCGAAAGAAGUCAUGU-3'    |
|                      |               | Antisense | 5'-ACAUGACUUCUUUCGGCUG-3'    |
| SLC38A4 siRNA        | NM_018018     | Sense     | 5'-CAUUCUUGCUCACUUCUAU-3'    |
|                      |               | Antisense | 5'-AUAGAAGUGAGCAAGAAUG-3'    |
| Adar1 siRNA          | NM_019655     | Sense     | 5'-AGACAGUGGUCAACCAGAA-3'    |
|                      |               | Antisense | 5'-UUCUGGUUGACCACUGUCU-3'    |
| Msi2 siRNA           | NM_054043     | Sense     | 5'-GUUAGAUUCCAAGACGAUU-3'    |
|                      |               | Antisense | 5'-AAUCGUCUUGGAAUCUAAC-3'    |
| miR-3144-3p          | NR_036098     | Sense     | 5'-AUAUACCGUUCGGUCUCUUUA-3'  |
| AS-miR-3144-3p       |               | Antisense | 5'-UAAAGAGACCGAACAGGUUAU-3'  |
| ED_miR-3144(3_A<G)   |               | Sense     | 5'-AUGUACCGUUCGGUCUCUUUA-3'  |
| AS-ED_miR3144(3_A<G) |               | Antisense | 5'-UAAAGAGACCGAACAGGUACAU-3' |

**Supplementary Table 6. List of primer sequence used in PCR experiments.**

| Gene         | Accession No. | Primer  | Nucleotide sequence                                         |
|--------------|---------------|---------|-------------------------------------------------------------|
| ADAR1        | NM_001025107  | Forward | 5'-TGGCAGCCTCCGGGTG-3'                                      |
|              |               | Reverse | 5'-TGTCTGTGCTCATAGCCTTG-3'                                  |
| gADAR1       | NM_001025107  | Forward | 5'-CTTTCCGTCAAGATTTAAATT-3'                                 |
|              |               | Reverse | 5'-GGGATGATTCTTCTGATTTTC-3'                                 |
| ADAR1-mutant | NM_001025107  | Forward | 5'-GAGAACTGTCAATGACTGCTAT<br>GCAGCAATAATCTCCCGGAGAGGCTT-3'  |
|              |               | Reverse | 5'-AAGCCTCTCCGGGAGATTATTGCTG<br>CATAGCAGTCATTGACAGTTTCTC-3' |
| MSI2         | NM_138962     | Forward | 5'-AAAGGAGCGCCAGGGTTAAA-3'                                  |
|              |               | Reverse | 5'-GTCTGCGAACGTGACGAAAC-3'                                  |
| STXBP4       | NM_178509     | Forward | 5'-CCGGAGCCAAGTTGAGGTTA-3'                                  |
|              |               | Reverse | 5'-GGAGTGGATGAGGTCTTTGGG-3'                                 |
| SUV39H2      | NM_001193424  | Forward | 5'-GAGGCGCGAGGAGCTTG-3'                                     |
|              |               | Reverse | 5'-GCAGTAACGGGCACTTCAGA-3'                                  |
| GHR          | NM_000153     | Forward | 5'-AGCGCAGACGCGAACCC-3'                                     |
|              |               | Reverse | 5'-AGGCTCCTTAGAAGAATTTGTCTTT-3'                             |
| GLYAT        | NM_005834     | Forward | 5'-CTGGCTGCATCAGGGAGAAA-3'                                  |
|              |               | Reverse | 5'-GTCATATCCTGCTCCTGAGGG-3'                                 |
| SLC38A4      | NM_018018     | Forward | 5'-TGCAGGAACTGTGATTTGC-3'                                   |
|              |               | Reverse | 5'-TTCGAGCCCACCAACTTAAT-3'                                  |
| HMGS2        | NM_005518     | Forward | 5'-CCACCTGGTGACACAAACAG-3'                                  |
|              |               | Reverse | 5'-TATGATTCACGGGGAGAAGC-3'                                  |
| INMT         | NM_006774     | Forward | 5'-GAAACAGCGGCCGATGGGA-3'                                   |
|              |               | Reverse | 5'-AGGCATCAAGGCTACAGCAG-3'                                  |
| HMGA2        | NM_003483     | Forward | 5'-TGGGAGGAGCGAAATCTAA-3'                                   |
|              |               | Reverse | 5'-GGTGA ACTCAAGCCGAAG-3'                                   |
| MET          | NM_000245     | Forward | 5'-TGCAGCGCGTTGACTTATTCATGG-3'                              |
|              |               | Reverse | 5'-GAAACCACAACCTGCATGAAGCGA-3'                              |
| HOXA9        | NM_152839     | Forward | 5'-CCCCATCGATCCCAATAACCC-3'                                 |
|              |               | Reverse | 5'-GGTGAGGTTGAGCAGTCGAG-3'                                  |
| MKI67        | NM_002417     | Forward | 5'-TTGGTACTGGGGGAGGGAGA-3'                                  |
|              |               | Reverse | 5'-TGGGAGGCGAAAAAGTAAAA-3'                                  |
| mir-3144     | NR_036098     | Forward | 5'-TCATGCAAATGGAAACCAAA-3'                                  |
|              |               | Reverse | 5'-CGTTCATTGTTAAAGGTCACGA-3'                                |
| GAPDH        | NM_002046     | Forward | 5'-ACCAGGTGGTCTCCTCTGAC-3'                                  |
|              |               | Reverse | 5'-TGCTGTAGCCAAATTCGTTG-3'                                  |
| gGAPDH       | NM_002046     | Forward | 5'-ACCCAGAAGACTGTGGATGG-3'                                  |
|              |               | Reverse | 5'-TTCTAGACGGCAGGTCAGGT-3'                                  |

gADAR1, primers for amplifying genomic *ADAR1*

ADAR1-mutant, primers for generation of deaminase inactivated pcDNA3.1\_ADAR1-p110

mir-3144, primers for sanger sequencing of mir-3144

## Supplementary figures

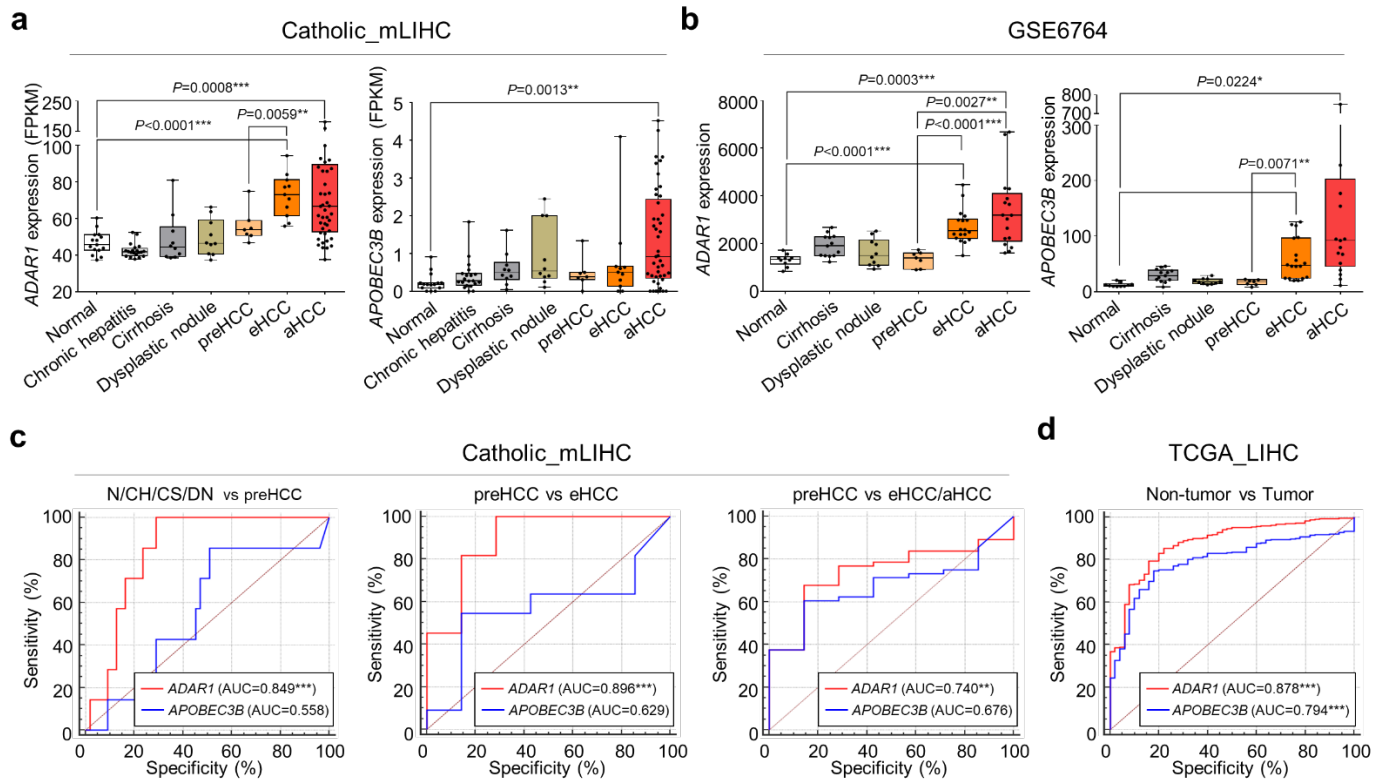

**Supplementary Fig. 1. Comparison of ADAR1 and APOBEC3B expression in multi-stage liver cancer.** ADAR1 and APOBEC3B expression in multi-stage liver cancer. Expression changes of ADAR1 and APOBEC3B in multi-stage liver disease patients of **a** Catholic\_mLIHC (n=108) and **b** GSE6764 (n=17). Statistically significant differences were determined using Welch's *t* test,  $P < 0.05^*$ ,  $P < 0.01^{**}$ ,  $P < 0.0001^{***}$ . The ROC curve analysis of the ADAR1 and APOBEC3B in liver cancer patients of **c** Catholic\_mLIHC and **d** TCGA\_LIHC. Statistically significant difference in AUC is compared with reference line (AUC=0.5). N, normal liver. CH, chronic hepatitis B virus infection. DN, dysplastic nodule.



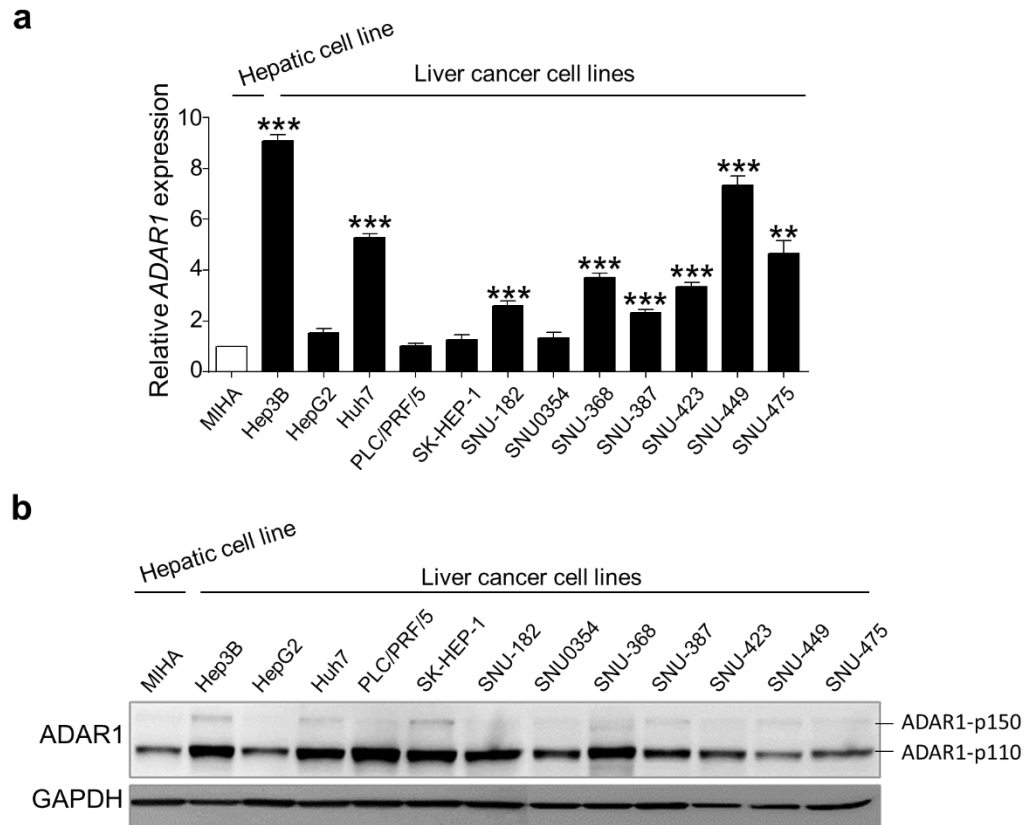

**Supplementary Fig. 2. ADAR1 expression in liver cancer cell lines.** ADAR1 is overexpressed in liver cancer cell lines. Expression of ADAR1 in an immortalized normal hepatic cell line and twelve liver cancer cell lines using qRT-PCR **a** and Western blot analysis **b**. \* $P < 0.05$ , \*\* $P < 0.01$ , \*\*\* $P < 0.001$ ; unpaired  $t$ -test.

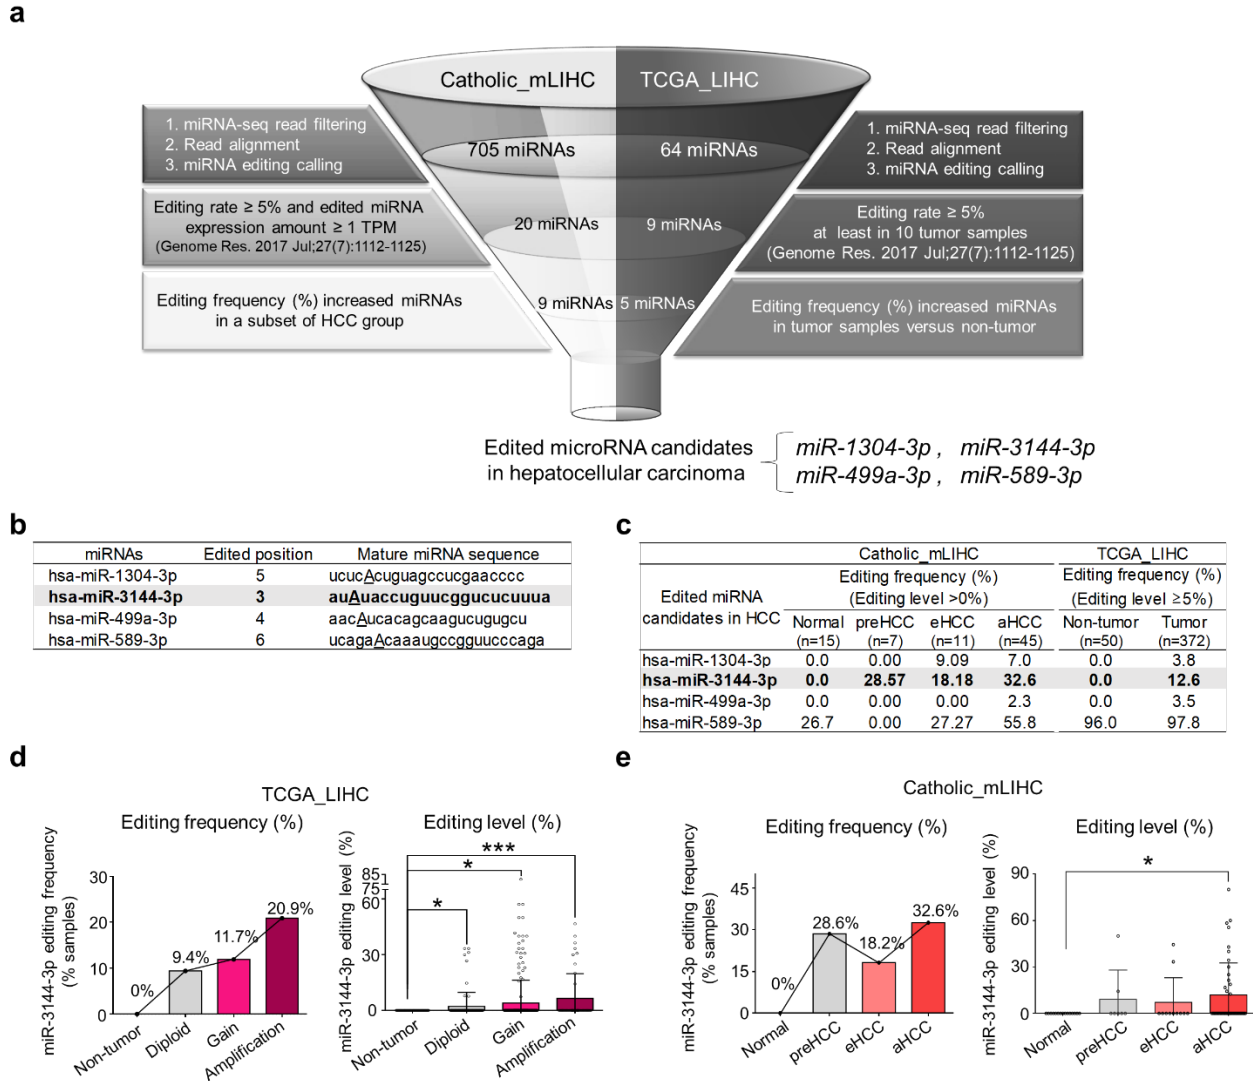

**Supplementary Fig. 3. Identification of ADAR1 editing miRNAs in liver cancer.** Identification of edited miRNA hotspots in liver cancer. **a** Flowchart for the bioinformatic pipeline for identification of edited miRNAs in liver cancer. **b** Editing position summary of the 4 edited miRNAs in liver cancer. **c** The A-to-I editing frequency of the 4 miRNAs was analyzed with the two liver cancer small-RNA sequencing datasets of Catholic\_mLIHC and TCGA\_LIHC. **d** Copy gain and amplification of *ADAR1* are associated with increased editing frequency (% samples) of miR-3144-3p compared to normal and diploid groups analyzed with liver cancer TCGA dataset (left panel). Genomic copy number gain (gain and amplification) is related to the increased editing level (%) of miR-3144-3p shown as a boxplot (right panel). **e** The editing frequency (% patient samples) of miR-3144-3p is increased in overt liver cancer (left panel). Differential editing level (%) of miR-3144-3p in multi-stage human liver cancer tissues analyzed with Catholic\_mLIHC (right panel).

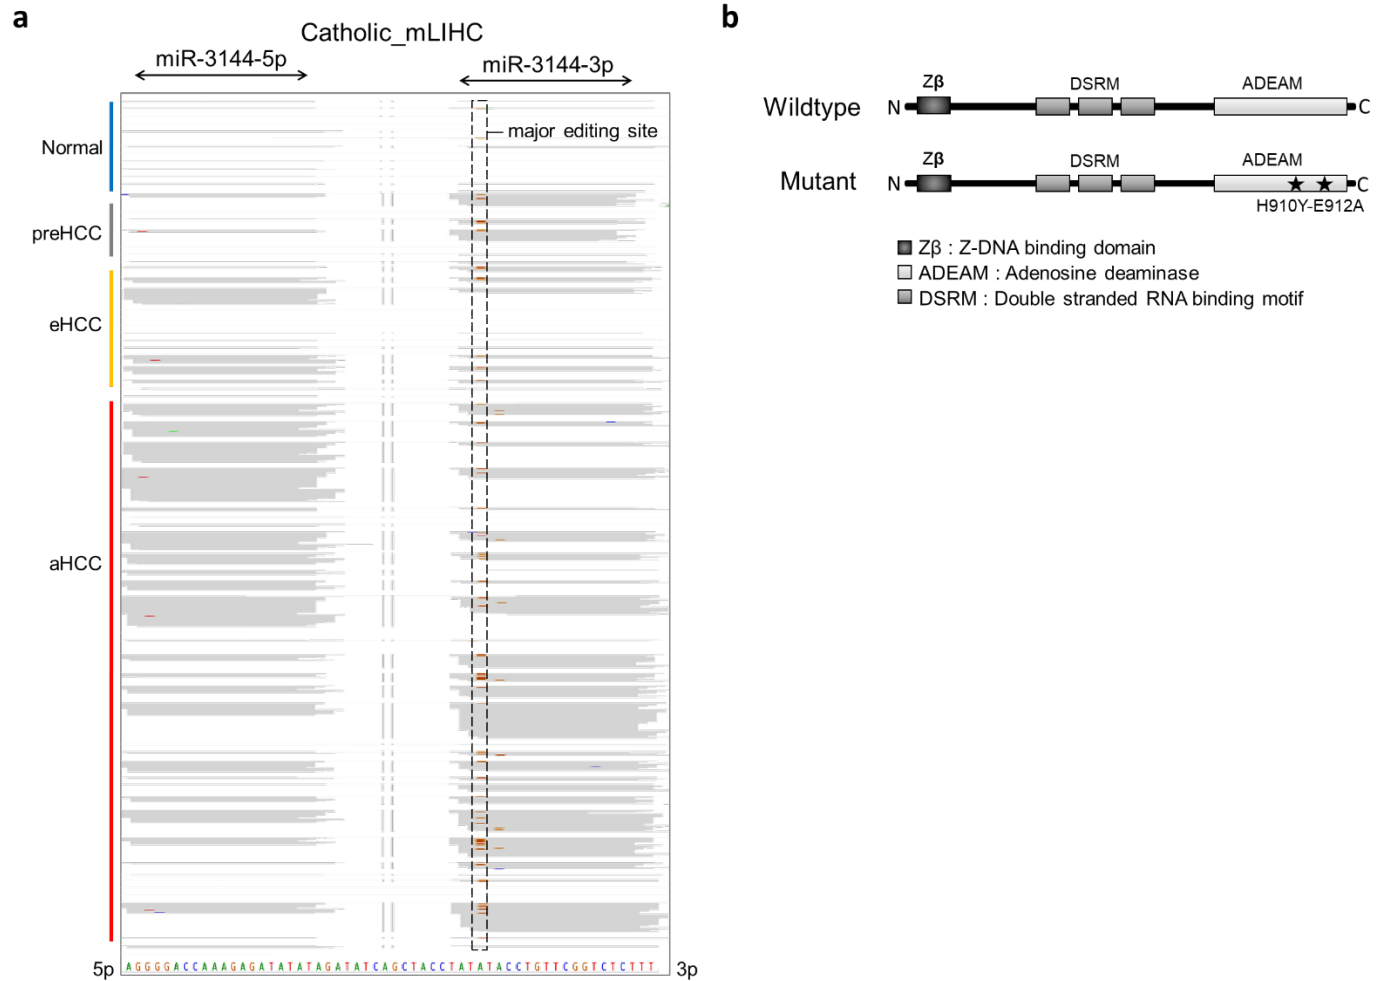

**Supplementary Fig. 4. Visualization of miR-3144-3p editing *in silico*.** Validation of miR-3144-3p editing *in silico* and *in vitro*. **a** The A-to-I editing sites of miR-3144-3p seed region are observed in overt liver cancer patient samples visualized by Integrative genomics viewer (IGV). **b** Schematic protein structure diagram of wildtype and adenosine deaminase mutant for ADAR1-p110.

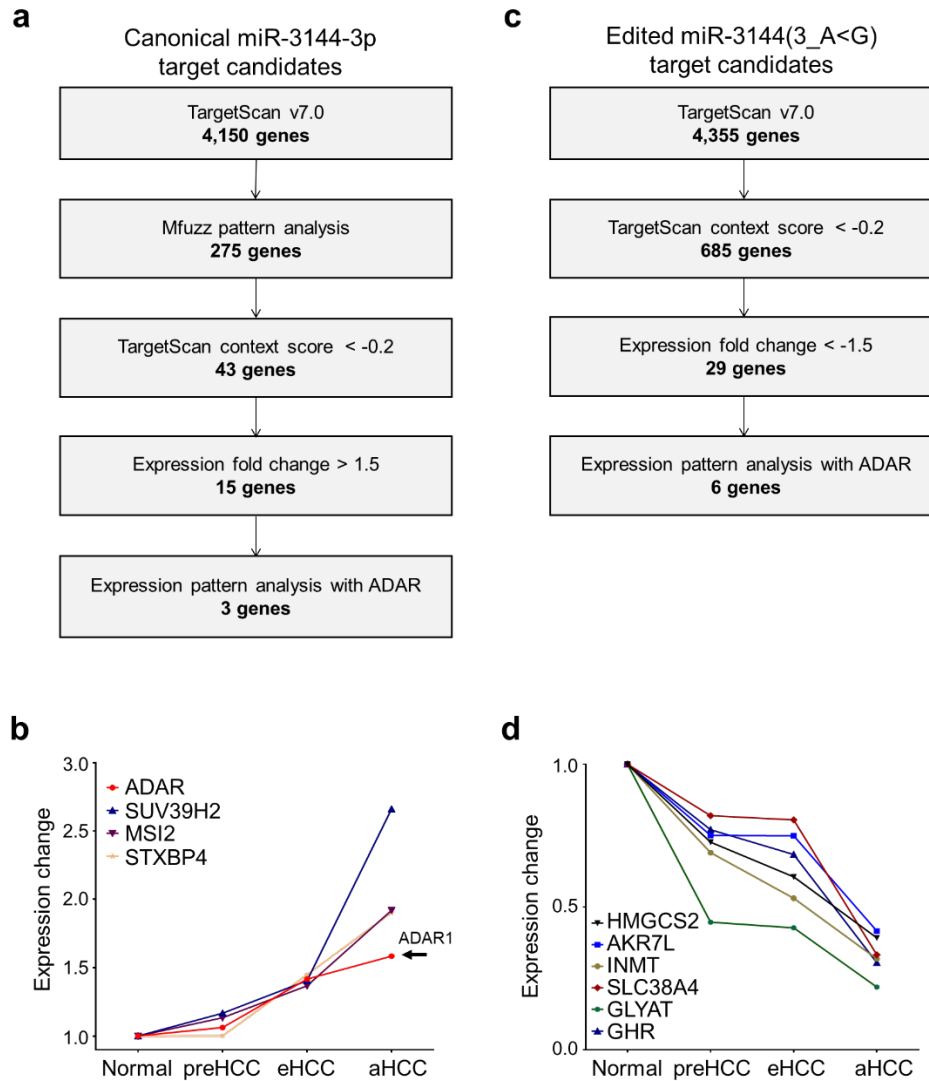

**Supplementary Fig. 5. Strategies to identify targets of canonical miR-3144-3p and Edited miR-3144(3\_A<G) in liver cancer.** Strategy to identify miR-3144-3p and ED\_miR-3144(3\_A<G) target in liver cancer. **a** miR-3144-3p targets are identified with TargetScan v7.0 algorithm and their expressions were analyzed with 3 liver cancer transcriptome sequencing datasets, TCGA\_LIHC, Catholic\_mLIHC, and ICGC\_LIRI. **b** The target candidate expression changes of miR-3144-3p in overt liver cancer, Catholic\_mLIHC. **c** ED\_miR-3144(3\_A<G) targets are identified with TargetScan v7.0 algorithm and their expressions were analyzed with 3 liver cancer transcriptome sequencing datasets, TCGA\_LIHC, Catholic\_mLIHC, and ICGC\_LIRI. **d** The target candidate expression changes of ED\_miR-3144(3\_A<G) in overt liver cancer, Catholic\_mLIHC.

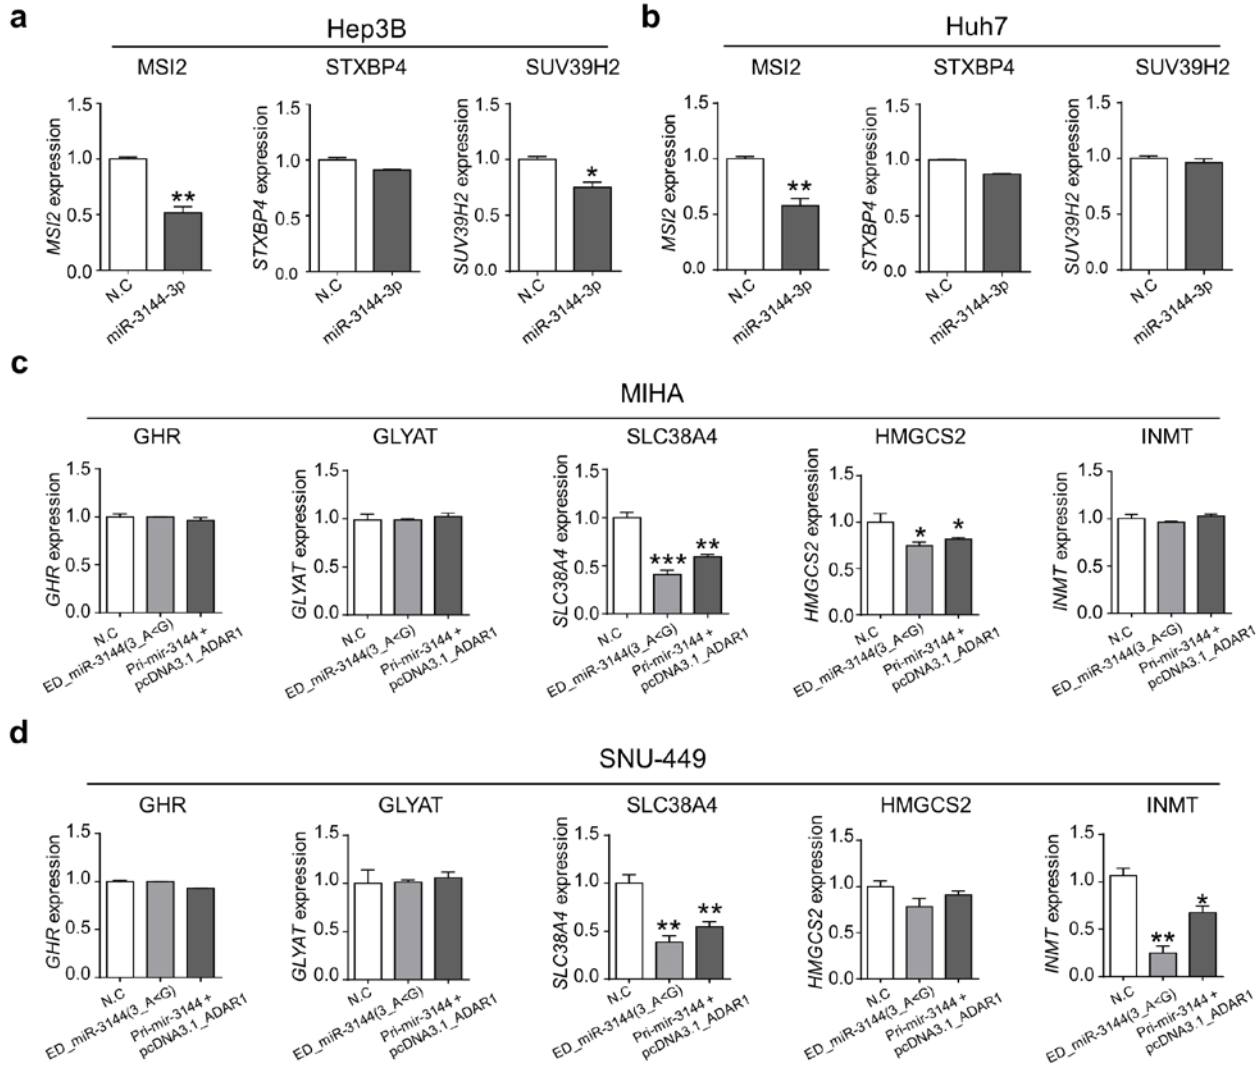

**Supplementary Fig. 6. Target validation of canonical miR-3144-3p and ED\_miR-3144(3\_A<G>).** Target validation of miR-3144-3p and ED\_miR-3144(3\_A<G>) with qRT-PCR. **a** Hep3B and **b** Huh7 were transfected with negative control (N.C) or miR-3144-3p mimics and the expression of the three target candidates was measured by qRT-PCR. The expression of the five target candidates were analyzed after transfection of ED\_miR-3144(3\_A<G>) or pcDNA3.1\_ADAR1-p110 in the background of transfected primary mir-3144 (Pri-mir-3144) in **c** MIHA and **d** SNU-449 cells with qRT-PCR. All data are shown as the mean  $\pm$  SEM. \* $P < 0.05$ , \*\* $P < 0.01$ , \*\*\* $P < 0.001$  by unpaired student's  $t$  test.

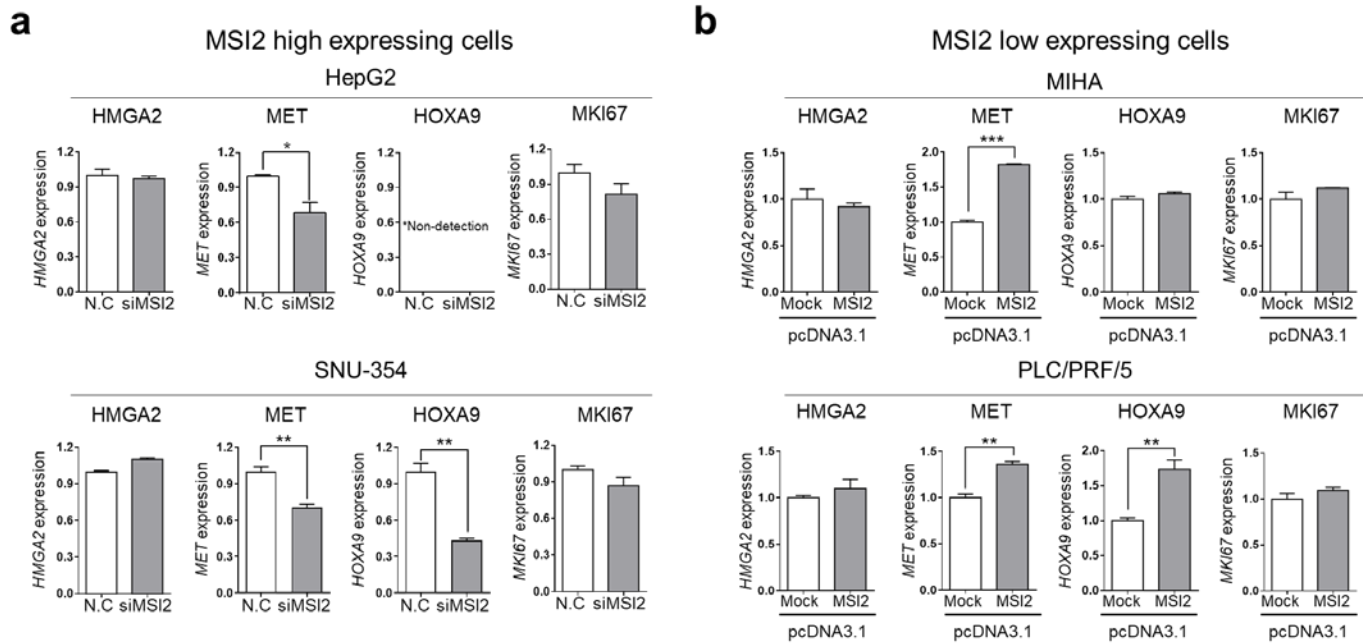

**Supplementary Fig. 7. Selective regulation of MET by MSI2 in liver cancer.** Expression validation of MSI2 target candidates by qRT-PCR. **a** Negative control siRNA (N.C) or siMSI2 was transfected to two liver cancer cells (HepG2 and SNU-354), and the expression was validated by qRT-PCR. **b** MIHA and PLC/PRF/5 cells were transfected with pcDNA3.1\_Mock or pcDNA3.1\_MSI2 and the expression of the candidate genes were measured with qRT-PCR. All data are shown as the mean  $\pm$  SEM. \* $P < 0.05$ , \*\* $P < 0.01$ , \*\*\* $P < 0.001$  by unpaired student's  $t$  test.

**a**

| Pearson correlation r<br>(with ADAR1) | TCGA_LIHC            | ICGC_LIRI             | GSE77314             | Catholic_mLIHC       |
|---------------------------------------|----------------------|-----------------------|----------------------|----------------------|
| MSI2                                  | 0.489 ***<br>(n=421) | 0.472 ***<br>(n=439)  | 0.525 ***<br>(n=100) | 0.368 ***<br>(n=119) |
| SLC38A4                               | -0.138 **<br>(n=421) | -0.233 ***<br>(n=439) | -0.230 *<br>(n=100)  | -0.270 **<br>(n=119) |

**b**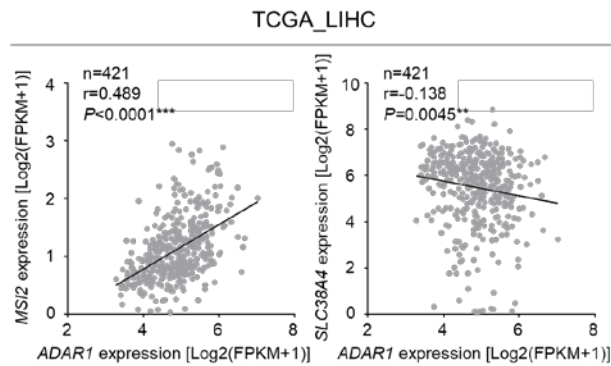**c**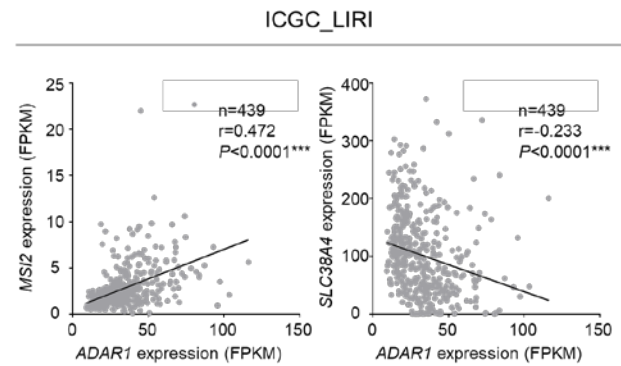**d**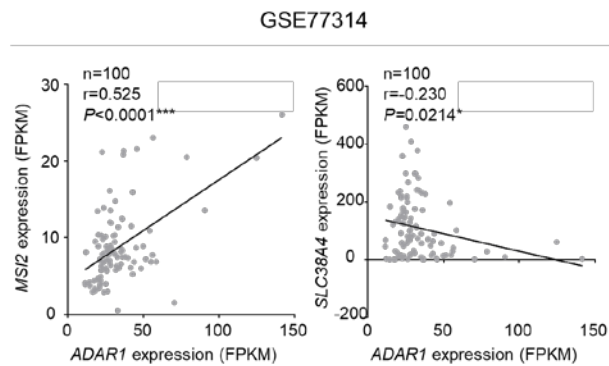**e**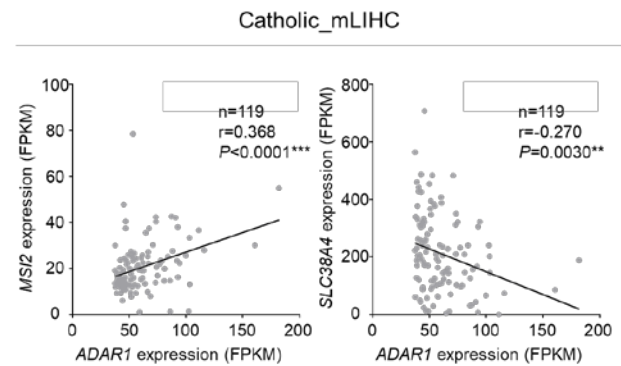

**Supplementary Fig. 8. Correlation analysis of the *ADAR1* with *MSI2* and *SLC38A4* in liver cancer.** **a** Correlation analysis of *ADAR1* mRNA level with *MSI2* and *SLC38A4* mRNA level in the transcriptomic liver cancer patient's datasets of **b** TCGA\_LIHC, **c** ICGC\_LIRI, **d** GSE77314, **e** Catholic\_mLIHC datasets. \* $P < 0.05$ , \*\* $P < 0.01$ , \*\*\* $P < 0.001$  by Pearson's coefficient tests.
